1 **High-Throughput Sequencing of Transposable Element Insertions**  
2 **Suggests Adaptive Evolution of the Invasive Asian Tiger Mosquito**  
3 **Towards Temperate Environments**

4 Clément Goubert<sup>1</sup>, Hélène Henri<sup>1</sup>, Guillaume Minard<sup>2,3</sup>, Claire Valiente Moro<sup>2</sup>, Patrick  
5 Mavingui<sup>2,4</sup>, Cristina Vieira<sup>1</sup> and Matthieu Boulesteix<sup>1</sup>

6 <sup>1</sup>Université de Lyon, F-69622, Lyon, France; Université Claude Bernard Lyon 1, CNRS,  
7 Laboratoire de Biométrie et Biologie Evolutive, UMR5558, F-69100 Villeurbanne, France

8 <sup>2</sup>Université de Lyon, F-69622, Lyon, France; Université Lyon 1, Villeurbanne, France;  
9 CNRS, UMR 5557, Ecologie Microbienne, Villeurbanne, France; INRA, UMR 1418,  
10 Villeurbanne, France

11 <sup>3</sup>Metapopulation Research Center, Department of Biosciences, University of Helsinki,  
12 Helsinki, Finland

13 <sup>4</sup>Université de La Réunion, UMR PIMIT, INSERM 1187, CNRS 9192, IRD 249,  
14 Plateforme Technologique CYROI, Sainte-Clotilde, La Réunion.

15 **Keywords:** Invasive species, *Aedes albopictus*, Local Adaptation, Genome Scan,  
16 Transposable Elements

17 **Corresponding author:** Matthieu Boulesteix, Université de Lyon, F-69622, Lyon,  
18 France; Université Claude Bernard Lyon 1, CNRS, Laboratoire de Biométrie et Biologie  
19 Evolutive, UMR5558, F-69100 Villeurbanne, France; phone: +334 72 43 29 16, fax:

20 +334 72 43 13 88; email: [matthieu.boulesteix@univ-lyon1.fr](mailto:matthieu.boulesteix@univ-lyon1.fr)

21 **Running title:** Molecular adaptation in *Ae. albopictus*

## 22 **Abstract**

23 Invasive species represent unique opportunities to evaluate the role of local  
24 adaptation during colonization of new environments. Among these species, the  
25 Asian tiger mosquito, *Aedes albopictus*, is a threatening vector of several human  
26 viral diseases, including dengue and chikungunya, and raises concerns about the  
27 Zika fever. Its broad presence in both temperate and tropical environments has  
28 been considered the reflection of great "ecological plasticity". However, no study  
29 has been conducted to assess the role of adaptive evolution in the ecological  
30 success of *Ae. albopictus* at the molecular level. In the present study, we  
31 performed a genomic scan to search for potential signatures of selection leading  
32 to local adaptation in one-hundred-forty field-collected mosquitoes from native  
33 populations of Vietnam and temperate invasive populations of Europe. High-  
34 throughput genotyping of transposable element insertions led to the discovery of  
35 more than 120 000 polymorphic loci, which, in their great majority, revealed a  
36 virtual absence of structure between the bio-geographic areas. Nevertheless, 92  
37 outlier loci showed a high level of differentiation between temperate and tropical  
38 populations. The majority of these loci segregates at high insertion frequencies  
39 among European populations, indicating that this pattern could have been caused  
40 by recent adaptive evolution events in temperate areas. An analysis of the  
41 overlapping and neighboring genes highlighted several candidates, including

42 diapause, lipid and juvenile hormone pathways.

## 43 **Introduction**

44 Biological invasions represent unique opportunities to study rapid evolutionary changes,  
45 such as adaptive evolution. Settlement in a novel area is a biological challenge that  
46 invasive species have successfully overcome. The underlying processes can be studied  
47 at the molecular level, particularly to gather empirical knowledge of the genetics of  
48 invasions, a field of study that has produced extensive theoretical predictions for which  
49 there is still little evidence in nature (Colautti & Lau 2015). Some of the main concerns  
50 are disentangling the effects of neutral processes during colonization, such as founder  
51 events or allele surfing at the migration front, from adaptive evolution (i.e., local  
52 adaptation, Lande 2015; Peischl & Excoffier 2015; Colautti & Lau 2015).

53 Signatures of adaptation can be tracked on genomes due to characteristic patterns of  
54 reduced genetic diversity left by the appearance and spread of a new beneficial  
55 mutation (Tajima 1989; Braverman *et al.* 1995; Fay & Wu 2000; Nielsen 2005; Vitti *et al.*  
56 2013). Contrasting regimes of selection between populations can also leave high levels  
57 of genetic differentiation in the vicinity of adaptive loci (Lewontin & Krakauer 1973;  
58 Maynard Smith & Haigh 1974). The strength of such signals can be influenced by the  
59 origin of the adaptive mutation, e.g., if it arises *de novo* or if it spreads from the standing  
60 genetic variation (Pritchard *et al.* 2010; Messer & Petrov 2013). However, detection of  
61 the footprint of natural selection is dependent on the availability of informative genetic  
62 markers, which should ideally provide substantial coverage of the genome to allow  
63 selection scans and be easily and confidently scored across many individuals.

64 Unfortunately, invasive organisms are rarely model species, making the development of  
65 a reliable and efficient marker challenging.

66 The Asian tiger mosquito, *Aedes (Stegomyia) albopictus* (Diptera:Culicidae) is currently  
67 one of the most threatening invasive species (Invasive Species Specialist Group).

68 Originating from Southeastern Asia, it is one of the primary vectors of dengue and  
69 chikungunya viruses and is also involved in the transmission of other threatening  
70 arboviruses (Paupy *et al.* 2009), in particular, the newly emerging Zika virus (Grard *et al.*

71 2014; Marcondes & Ximenes 2015; Chouin-Carneiro *et al.* 2016). Nowadays, *Ae.*

72 *albopictus* has settled in every continent except Antarctica and is found in both tropical

73 and temperate climates (Bonizzoni *et al.* 2013). Though this species is supposed to

74 have emerged from rain forests (Hawley 1988), the acknowledged native area of *Ae.*

75 *albopictus* encompasses contrasting environments including temperate regions of Japan

76 and China, offering a large potential of fit towards the most recently colonized

77 environments. For example, the induction of photoperiodic diapause in temperate areas,

78 which has a genetic basis in *Ae. albopictus* (Hawley *et al.* 1987; Hanson & Craig 1994;

79 Urbanski *et al.* 2010), is decisive to ensure invasive success in Europe or Northern

80 America. It allows the susceptible populations to survive through winter at the larval

81 stage into eggs. Such a trait appears to be governed by a “genetic toolkit” involving

82 numerous genes and metabolic networks for which the genetic polymorphism between

83 diapausing and non-diapausing strains remains to be elucidated (Poelchau *et al.*

84 2013a). In addition, the colonization of new areas that appear similar to the native

85 environment at first glance can still involve *de novo* adaptation; even environments that

86 share climatic variables are not necessarily similar regarding edaphic and biotic  
87 interactions (Colautti & Lau 2015). This suggests that, regardless of the native and  
88 settled environments, it might be possible to find evidence of adaptive evolution in  
89 invasive populations of *Ae. albopictus*.

90 To better understand the invasive success of this species, we genotyped 140 field  
91 individuals collected from three Vietnamese (native tropical area) and five European  
92 (invasive temperate area) populations (Figure 1), aiming to identify genomic regions  
93 involved in local adaptation. To do so, we developed new genetic markers based on  
94 high-throughput genotyping of the insertion of transposable elements (TEs) that  
95 represent at least one third of the genome of *Ae. albopictus* and include recently active  
96 families that can reach thousands of copies in one genome (Goubert *et al.* 2015).

97 Amplification of TE insertions is particularly efficient to obtain many genetic markers  
98 throughout one genome (Bonin *et al.* 2008), especially if few genomic resources are  
99 available (Monden *et al.* 2014), which was the case for the Asian tiger mosquito until  
100 recently. In addition, such markers represent an attractive alternative to other methods  
101 of diversity reduction such as RAD-sequencing (Miller *et al.* 2007) that could be less  
102 efficient in species with a high TE load (Davey *et al.* 2012) and did not produce  
103 satisfying results in *Ae. albopictus* (Goubert *et al.* 2016). In mosquitoes, TEs have been  
104 shown to be powerful markers for both population structure analysis (Biedler *et al.* 2003;  
105 Boulesteix *et al.* 2007; Santolamazza *et al.* 2008; Esnault *et al.* 2008) and genome  
106 scans (Bonin *et al.* 2009).

107 We hypothesized that some TE insertion sites could be located in the neighborhood of

108 targets of natural selection and thus could reach a high level of differentiation between  
109 native and invasive populations if selective sweeps occurred during local adaptation. In  
110 addition, some TEs could also insert near or inside coding regions and many studies  
111 have shown their recurrent involvement in environmental adaptation in multiple  
112 organisms (Casacuberta & González 2013), eventually contributing to the success of  
113 invasive species (Schrader et al. 2014, Stapley et al. 2015).

114 To distinguish between neutral demographic effects and adaptive evolution, we first  
115 performed population genetic analyses to reveal the global genetic structure of the  
116 studied populations. We then performed a genomic scan for selection and identified 92  
117 candidate loci under directional selection, among which several are located within or in a  
118 close neighborhood of annotated genes, revealing candidate pathways to investigate in  
119 forthcoming studies.

## 120 **Materials and Methods**

### 121 **Biological samples**

122 One hundred-forty flying adult female *Ae. albopictus* were collected in the field at eight  
123 sampling sites in Europe and Vietnam during the summers of 2012 and 2013 (Figure 1  
124 and Table S1). Individuals were sampled using either a single trap or aspirators through  
125 the sampling site within a 50-meter radius. When traps were used, live mosquitoes were  
126 collected after a maximum of two days.

### 127 **High-throughput transposon display (TD) genotyping**



128 The insertion polymorphism of the five transposable element families (I Loner Ele1 (IL1),  
129 Loa Ele2B (L2B), RTE4, RTE5 and Lian 1) identified by Goubert *et al.* (2015) in *Ae.*  
130 *albopictus* was characterized using transposon display (TD), a TE insertion-specific PCR  
131 method, combined with Illumina sequencing of all TD amplification products (Figure S1).  
132 These TE families were chosen according to high copy number estimate (from 513 to  
133 4203 copies), high identity between copies, and a “copy and paste” mode of  
134 transposition (all these TEs are non-LTR retrotransposons).

135 **DNA extraction and TD adapter ligation.** The total DNA was extracted from whole  
136 adult bodies following the phenol-chloroform protocol described by Minard *et al.* (2015).  
137 The TD was conducted combining methods from previous studies (Munroe *et al.* 1994;  
138 Roy *et al.* 1999; Akkouche *et al.* 2012; Carnelossi *et al.* 2014). First, individual extracted  
139 DNA ( $\approx 75$  ng) was used for enzymatic digestion in a total volume of 20  $\mu\text{L}$ , with HindIII  
140 enzyme (10 U/ $\mu\text{L}$ ) and buffer R (Thermo Scientific) for 3 hours at 37°C. The enzyme  
141 was inactivated at 80°C for 20 minutes. TD adapters were then built by hybridizing  
142 Hindlink with MSEB oligonucleotides (100  $\mu\text{M}$ , see Table S2) in 20X SSC and 1 M Tris  
143 in a total volume of 333  $\mu\text{L}$  after 5 min of initial denaturation at 92°C  
144 C and 1 h at room temperature for hybridization. Once ready, the TD adapters were  
145 ligated to 20  $\mu\text{L}$  of the digested DNA by mixing 2  $\mu\text{L}$  of TD adapter with 10 U T4 ligase  
146 and 5X buffer (Fermentas) in a final volume of 50  $\mu\text{L}$  for 3 hours at 23°C.

147 **Library construction.** For each individual and for each of the five TE families, the TE  
148 insertions were amplified by PCR (PCR 1) in a Biorad Thermal Cycler (C1000 or S1000)  
149 in a final volume of 25  $\mu\text{L}$ . The mixture contained 2  $\mu\text{L}$  of digested-ligated DNA with 1  $\mu\text{L}$

150 dNTPs (10 mM), 0.5  $\mu$ L TD adapter-specific primer (LNP, 10  $\mu$ M, see S3 Table) and 0.5  
151  $\mu$ L of TE-specific primer (10  $\mu$ M), 1 U AccuTaq polymerase (5 U/ $\mu$ L) with 10X buffer and  
152 dimethyl sulfoxide (Sigma). Amplification was performed as follows: denaturation at  
153 98°C for 30 seconds then 30 cycles of 94°C for 15 seconds, hybridization at 60°C for 20  
154 seconds and elongation at 68°C for 1 minute; a final elongation was performed for 5  
155 minutes at 68°C. For L2B and RTE5 TEs, a nested PCR was performed to increase  
156 specificity under the same PCR conditions using internal forward TE primers and LNP  
157 (Table S2). The PCR 1 primers include a shared tag sequence that was used for  
158 hybridization of the individual indexes by PCR 2.

159 Multiple independent PCR1 can be performed to avoid amplification bias during the  
160 library preparation (Recknagel *et al.* 2015). Accordingly, three independent PCR 1 were  
161 performed from the same digestion product for each TE family. The PCR 1 products (3  
162 PCR \* 5 TE per individual) were then purified using volume-to-volume Agencout  
163 AMPure XP beads (20  $\mu$ L PCR 1 + 20  $\mu$ L beads) and eluted in 30  $\mu$ L resuspension  
164 buffer. After NanoDrop quantification, equimolar pools containing the 3\*5 PCR products  
165 per individual were made using a Tecan EVO200 robot. Individual pools were then size  
166 selected for 300 to 600 bp fragments using Agencout AMPure XP beads as follows: first,  
167 the magnetic beads were diluted in H<sub>2</sub>O at a 1:0.68 ratio then added to 0.625 X PCR  
168 products to exclude long fragments. A second purification was performed using a non-  
169 diluted bead:DNA ratio of 1:8.3 to exclude small fragments.

170 Multiplexing samples was performed using a homemade 6 bp index (included in SRA  
171 individual name), which was added to the R primer (Table S2) during a second PCR

172 (PCR 2) with 12 cycles in an ABI 2720 Thermal Cycler. The mixture contained 15 ng  
173 PCR products, 1  $\mu$ l of dNTPs (10 mM), 0.5  $\mu$ l MTP Taq DNA polymerase (5 U/ $\mu$ l,  
174 Sigma), 5  $\mu$ l 10X MTP Taq buffer and 1.25  $\mu$ l of each tagged primer (20  $\mu$ M) in a final  
175 volume of 50  $\mu$ l. Amplification was performed as follows: denaturation at 94°C for 60  
176 seconds then 12 cycles of denaturation at 94°C for 60 seconds, hybridization at 65°C for  
177 60 seconds and elongation at 72°C for 60 seconds; a final elongation was performed for  
178 10 minutes at 72°C. The PCR 2 products were purified using an Agencout AMPure XP  
179 bead:DNA ratio of 1:1.25 to obtain libraries. TD product purification, library preparation  
180 and paired-end sequencing using an Illumina Hiseq 2000 (1 lane) was performed at the  
181 GeT-PlaGe core facility (Genome and Transcriptome, Toulouse) using a TruSeq PE  
182 Cluster Kit v3 (2x100 bp) and a TruSeq SBS Kit v3.

### 183 **Bioinformatic treatment of TD sequencing.**

184 The steps of the informatics treatment from the raw sequencing dataset to population  
185 binary (1/0) matrices for the presence/absence of TE insertions per individual are  
186 described in Figure S2. First (Figure S2-A), the paired-end reads of each individual were  
187 quality checked and trimmed using UrQt v. 1.0.17 (Modolo & Lerat 2015) with standard  
188 parameters and a *t* quality threshold of 10. The reads pairs were then checked and  
189 trimmed for Illumina adapter contamination using cutadapt (Martin 2011). Specific  
190 amplification of TE insertions was controlled by checking for the expected 3' TE  
191 sequence on the R1 read using Blat (Kent 2002) with an identity threshold of 0.90. Only  
192 reads with an alignment-length/read-length ratio  $\geq 0.90$  were retained. The R2 reads for  
193 which the R1 mate passed this filter were then selected for insertion loci construction

194 after removal of the TD adapter on the 5' start using cutadapt and removal of reads  
195 under 30 bp. Selected reads were separated in each individual according to the TE  
196 families for loci construction.

197 To correct for the inter-individual coverage variations, we performed a sampling of the  
198 cleaned reads (Figure S2-B). First, for each TE family, the distribution of the number of  
199 reads per individual was generated and individuals with fewer reads than the first decile  
200 of the distribution were removed; then, the cleaned reads of the remaining individuals  
201 were randomly sampled at the value of the first decile of coverage (this value varies  
202 among TE families). For each TE, the sampled reads of each retained individual were  
203 clustered together using the CD-HIT-EST program (Li & Godzik 2006) to recover  
204 insertion loci (Figure S2-C). In this all-to-all reads comparison, the alignments needed a  
205 minimum of 90 percent identity, the shortest sequence needed to be 95% the length of  
206 the longest, global identity was used and each read was assigned to its best cluster. In a  
207 second step, the reference reads of each locus within an individual, given by CD-HIT-  
208 EST, were clustered with all reference reads of all individuals using the same threshold  
209 to build the locus catalog, including a list of loci of all individuals and the coverage for  
210 each locus in each individual. After this step, the insertion loci that matched known  
211 repeats of the Asian tiger mosquito (Goubert *et al.* 2015) were discarded; alignments  
212 were performed with Blastn using the default parameters.

213 Since the quality control removed a substantial number of reads for the construction of  
214 the TE insertions catalog, the raw R2 reads (with their TD adapter removed), that could  
215 have been discarded in the first attempt were then mapped over the catalog to increase

216 the scoring sensibility (Figure S2-D). Before mapping, the raw R2 reads were also  
217 sampled at the first decile of individual coverage (as described previously). At this step,  
218 individuals who were removed from at least two TE families for loci construction were  
219 definitively removed from the whole analysis. Mapping (Figure S2-E) was performed  
220 over all the insertion loci of all TE families in a single run to prevent multiple hits. Blat  
221 was used with an identity threshold of 90 percent. Visual inspection of alignment quality  
222 over 30 sampled loci per TE family was performed to ensure the quality of scoring. Raw  
223 matrices were then filtered out (Figure S2-F) for a minimum insertion frequency of 2.5%  
224 among all individuals and aberrant loci with extreme (> 99th centile) coverage and  
225 coverage standard deviations were discarded. The final datasets consisted of one matrix  
226 per TE family with information for each individual concerning the presence (1) or  
227 absence (0) of TE for each of the selected loci.

228 To check if the sampling procedure would affect our results, the read sampling  
229 procedures and subsequent analysis were performed independently 3 times (replicates  
230 M1, M2 and M3).

231

### 232 **Genetic analyses and Genomic scan.**

233 The population structure analyses were performed independently for each TE family.  
234 Principal coordinates analyses (PCoAs) were performed to identify genetic clusters  
235 using the ade4 package (Dray & Dufour 2007) of R 3.2.1 (R development core team  
236 2015). The S7 coefficient of Gower and Legendre (1986) was used as a genetic

237 distance because it gives more weight to shared insertions as follows: with a, b, c and d  
238 taken from a contingency table such as a = 1/1 (shared presence); b = 1/0; c = 0/1 and d  
239 = 0/0 (shared absence);  $S7 = 2a / (2a+b+c)$ . Shared absences were not used because  
240 they do not provide information on the genetic distance between individuals due to the  
241 “copy and paste” mode of transposition of the TE used (shared ancestral state).  
242 Pairwise populations  $F_{ST}$  were computed using Arlequin 3.5 (Excoffier & Lischer 2010);  
243 the significance of the index was assessed over 1,000 permutations using a significance  
244 threshold of 0.05.

245 The genomic scan was performed in two steps for each of the sampling replicates of  
246 each TE. First, Bayescan 2.1 (Foll & Gaggiotti 2008) was used to test for the deviation of  
247 each locus from neutrality. Bayescan considers a fission/island model in which all  
248 subpopulations are derived from a unique ancestral population. In this model, variance  
249 in allele frequencies between subpopulations is expected to be due either to the genetic  
250 drift that occurred independently in each subpopulation or to selection that is a locus-  
251 specific parameter. The differentiation at each locus in each subpopulation from the  
252 ancestral population is thus decomposed into a  $\beta$  component (shared by all loci in a  
253 subpopulation) related to genetic drift and a  $\alpha$  component (shared at a locus by all  
254 subpopulations) due to selection. Using a Bayesian framework, Bayescan tests for the  
255 significance of the  $\alpha$  component at each locus. Rejection of the neutral model at one  
256 locus is conducted using posterior Bayesian probabilities and controlled for multiple  
257 testing using a false discovery rate. In addition, Bayescan integrates uncertainty about  
258 allele frequency from dominant data such as the TD polymorphism, leaving the

259 inbreeding coefficient ( $F_{IS}$ ) to vary between 0 and 1 during the Markov-Chain Monte-  
260 Carlo process. Bayescan was used with default values except for the prior odds, which  
261 were set to 100 (more compatible with datasets having thousands of loci, see Bayescan  
262 manual) and a significance  $q$ -value threshold of 0.05 to retain outlier loci.

263 In a second step, only outliers suggesting divergent directional selection between  
264 Europe and Vietnam were considered. To identify these, locus-by-locus analyses of  
265 molecular variance (AMOVAs) were performed using Arlequin 3.5 for each TE family.  
266 The significance of the  $F_{CT}$  (hierarchical analogue of the  $F_{ST}$  measuring the extent of  
267 differentiation between groups of populations) between Vietnamese and European  
268 populations was assessed by performing 10,000 permutations between individuals  
269 among populations with a significance threshold of 0.05. For each dataset, Bayescan  
270 outliers were cross-referenced with significant  $F_{CT}$  loci as an objective threshold to  
271 restrict the number of candidate loci.

272

### 273 **PCR validation and Outlier analyses.**

274 Pairs of primers were designed for each outlier locus to be used in standardized  
275 conditions. The forward primer was located in the TE end of the concerned family and  
276 the reverse primer was set from the outlier locus (Table S2). All primer pairs were first  
277 tested on a set of 10 individuals to assess their specificity using a 1/50 dilution of  
278 starting DNA from the TD experiment. Validated primers were then used to check the  
279 insertion polymorphisms in 47 representative individuals from the 8 populations studied  
280 in the TD experiment using 1/50 dilutions of the starting DNA (not all individuals could be

281 used because of DNA limitations). All PCRs were conducted in a final volume of 25  $\mu$ L  
282 using 0.5  $\mu$ L of diluted DNA, 0.5  $\mu$ L of each primer (10  $\mu$ M), 1  $\mu$ L of dNTPs (10 mM) and  
283 1 U of DreamTaq Polymerase with 1X green buffer (ThermoFisher Scientific).  
284 Amplification was performed as follows: denaturation at 94°C for 2 minutes then 34  
285 cycles including denaturation at 94°C for 30 seconds, hybridization at 60°C for 45  
286 seconds and elongation at 72°C for 45 seconds; a final elongation was performed for 10  
287 minutes at 72°C. After a 45 min migration of the PCR product on a 1X electrophoresis  
288 agarose gel, CG and MB assessed the insertion polymorphisms independently.

289 To identify the genomic environment of the outlier loci, their sequences (reference R2  
290 read) were mapped onto the assembled genome of *Ae. albopictus* assembly AaloF1  
291 strain Foshan (Chen *et al.* 2015) using Blastn. Blastn alignments were performed with  
292 default parameters and sorted according to their score. Additionally, each alignment was  
293 visually inspected for consistency. Outlier loci with multiple identical hits were discarded.

294 To identify genes surrounding the mapped outliers, we used annotations from  
295 VectorBase ([http:// www.vectorbase.org](http://www.vectorbase.org)) for the assembly or, if the *Ae. albopictus* gene  
296 was missing annotation, we used the annotation of orthologues in closely related  
297 species. In addition, we questioned whether genes potentially involved in the diapause  
298 pathway, a critical adaptation required in temperate environments, may be associated  
299 with outliers. In a previous publication, Poelchau *et al.* (2013a) identified that  
300 differentially expressed genes between diapause induced and non-diapause induced  
301 samples were significantly enriched in functional categories related to diapause  
302 preparation. These functional categories are defined *a priori* and tested for a more



303 significant differential expression than that expected by chance (Poelchau *et al.* 2013a).  
304 Because, at the time of this previous publication, the corresponding transcripts were  
305 associated to *Ae. aegypti* orthologues, we here mapped the original transcriptome data  
306 (annotated eggs and embryo assembly, downloaded at  
307 <http://www.albopictusexpression.org>) onto the AaloF1 genome assembly using blat with  
308 default parameters. After alignment, one best hit was retained per transcript according to  
309 the best alignment score. When a transcript had identical best hits, all positions for the  
310 transcript were considered. After alignments, the transcript positions were intersected  
311 with the AaloF1 gene set using bedtools v2.25.0 (Quinlan & Hall 2010) to identify  
312 corresponding *Ae. albopictus* genes. In addition, Chen *et al.* (2015) reported 71  
313 complete diapause-related genes that were merged to our initial candidate set. The  
314 eventual enrichment in outliers near these diapause-related genes was assessed using  
315 the following procedure: we estimated the total number of base pairs covered by  
316 diapause-related genes on the genome assembly and added the longest distance that  
317 we found between one outlier and its closer diapause related gene (up to the contig  
318 size) to their 5' and 3'; this defined the "diapause base-pairs". We then compared the  
319 ratio of the number of outliers found within these "diapause base pairs" over the total  
320 number of mapped outliers and the ratio of "diapause base-pairs" over the total  
321 assembly size using an exact binomial test.

322

## 323 Results

## 324 **High-throughput TE insertion genotyping**

325 The presence/absence of insertions of five TE families were genotyped in an initial  
326 number of 140 individuals using a combination of family-specific PCR and individually  
327 labelled high-throughput sequencing. Sequencing produced a total of 102,319,300  
328 paired-end reads (2x101 bp). After quality and specificity filtering, 24,332,715 reads  
329 were suitable for analyses. The loss of reads was in the great majority due to specificity  
330 filtering since quality only resulted in trimming. After application of the read sampling  
331 procedure to control for coverage variation between individuals, an average of 128,491  
332 polymorphic insertion loci were available for each of the three sampling replicates. A  
333 final 120 individuals were retained per TE family (discarded individuals vary per TE  
334 family). The mean number of loci per individual and per TE family ranged from  $1025 \pm$   
335  $290$  s.d. (IL1 family, mean and s.d. averaged over the three replicates) to  $3266 \pm 766$   
336 s.d. (RTE5 family). Details are given in Table S1. Although our read sampling procedure  
337 could have artificially lowered the mean insertion frequency of the loci, this effect should  
338 be small because in our final datasets the TE insertion frequencies (*i.e.*, the number of  
339 individuals who share an insertion) are not influenced by the mean number of reads per  
340 individual at the considered locus (Figure S3).

341

## 342 **Population structure.**

343 Principal coordinates analyses (PcoAs) were performed independently for each of the  
344 five TEs (Figure 2). The shared absence of a specific insertion was not considered in the

345 distance matrices in the PCoAs: Class I retrotransposons have a “copy and paste”  
346 transposition mechanism that allows us to infer the “absence” state as the ancestral  
347 allele. In addition, these TE insertions segregate at very low frequencies among  
348 individuals and thus a shared “absence” is likely to be non-informative with regard to an  
349 individual’s co-ancestry. Among the three main principal coordinates (PCs), individuals  
350 tend to be grouped according to their respective populations with little overlap between  
351 groups. However, the three main PCs represent only a small fraction of the total  
352 variance (< 10%), suggesting a weak genetic structuring between the populations.  
353 Overall, individuals from Vietnamese populations (HCM, TA, VT) tend to be grouped  
354 together in a single cluster, with the exception of 13 to 14 individuals from HCM for the  
355 L2B and RTE5 TE families (S2 Figure) and six individuals of VT with the RTE4 TE family  
356 (Figure 1) that cannot be clearly distinguished from European samples. BCN individuals  
357 (Spain) represent the most homogeneous group, well differentiated from Vietnamese  
358 and French individuals (SP, CGN, NCE and PLV).

359 In agreement with the PCoAs, the analyses of molecular variance (AMOVAs) attributed  
360 little genetic variance among groups (Vietnam-Europe) and between populations within  
361 groups (Table 1). In the studied populations, most of the genetic variance was  
362 distributed among individuals within groups.

363 The measures of genetic differentiation among pairs of populations were consistent  
364 between the PCoAs and AMOVAs (File S1): the BCN population shows the highest  $F_{ST}$   
365 with the other populations for each of the five TEs ( $0.051 < F_{ST} < 0.148$ ) whereas  
366 Vietnamese populations were the most closely related ( $0.011 < F_{ST} < 0.032$ ). Although

367 VT is located 100 km away from TA and HCM (both sampled in the same city, Hô Chi  
368 Minh, Vietnam), the  $F_{ST}$  values are very similar between the three Vietnamese  
369 populations, suggesting no influence of geography at this scale. CGN and NCE,  
370 sampled in the same urban area (Nice agglomeration), also differentiated little or were  
371 not significantly differentiated, depending on the TE family. The previously identified  
372 intermediate pattern of HCM with some European populations at the L2B and RTE5 loci  
373 (PCoAs) is also found at the  $F_{ST}$  level, especially for the low differentiation with the PLV  
374 population for these markers ( $0.011 < F_{ST} < 0.020$ ).

375

#### 376 **Genomic scan.**

377 Outlier loci for selection signature were searched using Bayescan (non-hierarchical  
378 island model) and then sorted for a significant  $F_{CT}$  (between Europe-Vietnam group  
379 differentiation) to retain only candidate loci compatible with a differential selection  
380 between continents. To reduce false positive risks due to uneven mutation rates  
381 between TE families, outlier scans were also performed independently for each TE  
382 family (Narum & Hess 2011; de Villemereuil *et al.* 2014). We identified 92 candidate  
383 insertion loci (Figure 3). Most of these insertions are found in both areas (no private  
384 allele), except for RTE4\_1638 and RTE4\_1898 that were not found in Vietnam. In  
385 addition, 74% of the outliers correspond to high-frequency insertions in Europe, which is  
386 significantly more than expected for a 50-50 chance (Chi-squared test,  $X=20.098$ ,  $P <$   
387  $0.01$ ) whereas this 50-50 pattern is observed comparing 92 randomly chosen loci with

388 the same overall insertion frequency ( $\geq 20$  individuals/locus, Chi-squared test,  $X=1.837$ ,  
389  $P = 0.175$ ) between Europe and Vietnam (Figure 4).

390 PCR amplification of the outlier loci was carried out on a representative panel of 47  
391 individuals to validate the insertion pattern detected using TD (see Materials and  
392 Method). For loci where the amplification was successful, the insertion pattern observed  
393 using PCR always confirmed the TD pattern (Figure S5).

394 From 92 outlier loci, 21 could be attributed to a unique position on the *Ae. albopictus*  
395 genome. Annotation and distance to surrounding genes are reported in the S2 File.  
396 Fifteen outliers mapped within contigs with identified genes. We found that 4 outliers (S2  
397 File, sheet 2, highlighted) loci are located on contigs that harbor diapause-related genes.  
398 Two of them (Lian1\_5902 and RTE4\_17015) are located in the direct vicinity, either  
399 inside or within 5654 bp, of these genes, which is significantly closer than expected by  
400 chance (exact binomial test,  $P = 0.014$ ). Lian1\_5902 is located in an intron of *lac1*  
401 (longevity assurance factor 1; AALF000670) and RTE4\_17015 neighbors the  
402 AALF004790 a lipophorin-coding gene. Both genes are known to be involved in lipid  
403 metabolic pathways. Although the other diapause related genes are not the closest  
404 genes of the two other outliers, they represent two singular groups of genes located in  
405 tandem: AALF020842 and AALF00843 located 71.05 kb from RTE5\_10123 and  
406 AALF020959, AALF020960, AALF020961, AALF020962, AALF020963 and  
407 AALF020965 located 216.6 kb from Lian1\_11252.

408 Three other outliers are located within other genes (outliers Lian1\_10005, Lian1\_9293  
409 and RTE4\_34941), including a hemolymph juvenile hormone-binding protein

410 (RTE4\_34941/ AALF012643). The 10 remaining outliers were located 21.1 kb to 85.2 kb  
411 from their closest gene.

412

## 413 **Discussion**

414 The goal of our study was to identify genomic regions involved in adaptive evolution of  
415 *Ae. albopictus* thanks to the development of new genetic markers. Through high-  
416 throughput genotyping of the insertion polymorphisms of five TE families, we identified  
417 up to 128,617 polymorphic loci among more than a hundred of individuals from eight  
418 sampling sites. The estimated genome size of *Ae. albopictus* exceeds one billion base-  
419 pairs (Goubert *et al.* 2015; Dritsou *et al.* 2015; Chen *et al.* 2015). Accordingly, the  
420 number of markers scored in this study offers a comfortable genomic density of one  
421 marker every 10 kb.

422 TE-based methods have been successfully used to perform population genetic analyses  
423 within a repetitive genomic environment, such as in the human genome (Watkins *et al.*  
424 2003; Witherspoon *et al.* 2013; Rishishwar *et al.* 2015). Similar high-throughput  
425 genotyping methods have been developed for a large panel of organisms (Witherspoon  
426 *et al.* 2010; Iskow *et al.* 2010; Sabot *et al.* 2011; Bridier-Nahmias *et al.* 2015; Monden &  
427 Tahara 2015) but relied on well-established reference genomes (human, rice,  
428 strawberry, yeast). Monden *et al.* (2014) recently completed such an analyses without a  
429 reference genome, to score 2024 loci from two TE families in sweet potato. Because of  
430 the number of available loci, and being the first of its kind in animals, our study

431 represents a large improvement. We provide a cost-efficient method to quickly generate  
432 many polymorphic markers without extensive knowledge of a species' genome.  
433 Specifically, this strategy appears extremely valuable for species with a large genome  
434 size in which the TE density could severely compromise the development of more  
435 classical approaches such as the very popular RAD sequencing.

436 The genetic structure of the studied populations showed strong consistency between  
437 sampling replicates of individual's reads, demonstrating the robustness of the method  
438 despite an initial substantial coverage variation among individuals. Population genetics  
439 analyses revealed a very low level of genetic structuring between European and  
440 Vietnamese populations. Among the studied populations, AMOVAs showed that most of  
441 the genetic variation is distributed between individuals within populations (> 90%), and  
442 as suggested by pairwise  $F_{ST}$  and PCoAs, only a small part (< 10%) of the genetic  
443 variance is due to differentiation between populations. The genetic differentiation we  
444 measured is as high among European populations as it is between populations from  
445 Europe and Vietnam.

446 This singular population structure is in agreement with previous results gathered in *Ae.*  
447 *albopictus* using different collections of allozymes, mtDNA or microsatellite markers  
448 (Black *et al.* 1988; Kambhampati *et al.* 1991; Zhong *et al.* 2013; Gupta & Preet 2014;  
449 Manni *et al.* 2015). Moreover, a recent analysis performed with a set of 11  
450 microsatellites on individuals from the same populations (with the exception of BCN)  
451 showed a similar distribution of genetic variation among hierarchical levels (Minard *et al.*  
452 2015). These results demonstrate the reliability of our markers and confirm that a non-

453 hierarchical island model can likely fit the global genetic structure. The genetic diversity  
454 observed in Europe is compatible with a scenario of multiple and independent  
455 introductions, as already suggested for *Ae. albopictus* (Urbanelli *et al.* 2000; Birungi &  
456 Munstermann 2002; Takumi *et al.* 2009; Becker *et al.* 2013). However, as previously  
457 suggested, this pattern could also be the result of founder events that may occur during  
458 colonization and/or a restriction of gene flow between populations after their  
459 introduction. Answering such a question would require extended sampling over the  
460 entire native area.

461 The outlier analysis revealed 92 loci with high posterior probabilities of being under  
462 positive selection between European and Vietnamese populations. When possible, the  
463 PCR amplification of the outlier loci using a set of representative individuals confirmed a  
464 shift of insertion frequencies toward either the European or the Vietnamese sampling  
465 sites. This suggests that, despite reduced coverage, introduced by sampling in the  
466 dataset, the scored insertion polymorphisms are reliable. In addition, our method of  
467 analysis is likely to be conservative: indeed, the Bayescan outliers were selected for  
468 their consistency with a significant  $F_{CT}$  between European temperate and Vietnamese  
469 tropical populations, which avoids retaining outliers that we were not looking for, for  
470 example those due to a population-specific event.

471 Interestingly, we found significantly more outlier loci with a high frequency in Europe and  
472 low frequency in Vietnam. This was unexpected under our initial assumptions as follows:  
473 a favored allele selected in one or another environment has *a priori* no reason to be  
474 more often associated with the presence or the absence of a TE insertion at linked sites.



475 A possible explanation is that the majority of the sequenced TE insertions segregate at  
476 low frequencies (approximately 10% of all individuals). When considering the linked  
477 region of one polymorphic TE insertion, if a favorable mutation appears in an individual  
478 in which the insertion is absent, the increase of frequency of this “absence” haplotype  
479 will thus, most of the time, have a modest effect on the genetic differentiation at this  
480 marker because it is already segregating at high frequency. In contrast, if a favorable  
481 mutation appears in a TE “presence” haplotype, the increase in frequency of the linked  
482 TE insertion would lead to high differentiation ( $F_{CT}$ ). In absence of an alternative  
483 explanation, our outlier loci could thus indicate in which subset of populations the  
484 adaptive mutation occurred and in the present case this would have occurred more  
485 frequently in the temperate populations. Additionally, the observation of such a low  
486 global insertion frequency is expected to reduce the risk of false positive outliers due to  
487 negative selection acting on potentially deleterious polymorphic insertions.

488 Two scenarios that are not mutually exclusive could be invoked in light of our data. A  
489 simple case would be a direct adaptive evolution in European invasive population that  
490 originated from tropical regions of the native area. A second hypothesis could be that  
491 invasive temperate populations came from the northernmost territories of the native area  
492 such as northern China or Japan where *Ae. albopictus* populations are already cold-  
493 adapted. It would be thus interesting to know whether the observed signature of  
494 selection results from more “ancient” adaptations in the native area or if it originates  
495 from more recent fine tuning of cold-related traits in the invasive areas. A recent study  
496 (Porretta *et al.* 2012) using new variable *COI* mtDNA sequences and historical species

497 range modeling suggested that northern territories of the native area of *Ae. albopictus*  
498 would be the latest to have been colonized after a range expansion from Southern  
499 refugia after the last glacial approximately 21,000 years ago. The authors suggested  
500 that *Ae. albopictus* may have followed the human populations during their expansion  
501 from South to North in this area that began approximately 15,000 years ago. Thus,  
502 regardless of the origin of the invasive individuals sampled in Europe, it is likely that they  
503 are representatives of populations that had recently undergone a shift of selective  
504 pressure from tropical to temperate climatic conditions. This could explain why so many  
505 outliers are associated with high insertion frequency in Europe and why some candidate  
506 genes in the diapause pathway are found in the neighborhood of some of these outliers.  
507 An easy method to distinguish between these possibilities would be to search if the  
508 same outlier insertions are present in several temperate populations from the native  
509 area.

510 We were able to assign a unique position for 21 of the outlier loci on the *Ae. albopictus*  
511 genome. Sixteen outliers were found inside or in the close vicinity of annotated genes,  
512 which may allow speculation on potential targets of selection. These genes encompass  
513 functions related to cell structure and organization, lipid metabolism, or signal  
514 transduction. A main challenge faced by temperate populations is overwintering (Mori *et al.*  
515 *al.* 1981; Hawley 1988; Takumi *et al.* 2009; Denlinger & Armbruster 2016). Previous  
516 studies have shown that the cell cycle and lipid metabolism are specifically solicited at  
517 multiple stage of the diapause preparation and maintenance (Urbanski *et al.* 2010;  
518 Poelchau *et al.* 2013a; b; Huang *et al.* 2015) to allow temperate populations to go

519 through winter within cold-resistant eggs. Although the genes found in our genome scan  
520 have not been functionally associated with diapause, two of them *laf1* (AALF000670)  
521 and a lipophorin-coding (AALF004790) are a differentially expressed between induced  
522 and non-induced samples during diapause preparation (Poelchau et al., 2013a) and are  
523 located closer than expected by chance from two of our outlier loci. These genes are  
524 both involved in lipid metabolism and could be thus strong candidates for adaptive  
525 evolution. Another notable candidate is AALF012643, a hemolymphatic carrier of the  
526 juvenile hormone (JH). JH appears to be critical in the maintenance of the diapause *in*  
527 *Ae. albopictus* but its exact function remains to be elucidated (Poelchau *et al.* 2013b).  
528 Although appropriate caution should be taken regarding the sole candidate status of  
529 these genes, it is worth mentioning that the diapause pathway has already been shown  
530 to benefit from rapid adjustments due to local adaptation in *Ae. albopictus*. For instance,  
531 Urbanski *et al.* (2012) showed that invasive American populations originating from  
532 Japan have rapidly evolved a new adaptive clinal response to diapause induction,  
533 independent from that observed in the native area. Thus, adaption in the temperate  
534 regions may have led to several selective sweeps on gene or regulatory sequences  
535 involved in this critical pathway, allowing the settlement of the mosquito in new  
536 temperate areas. Further experiments, including fine-scale study of the genetic diversity  
537 of these candidates among populations, are needed to assess their potential implication  
538 in the adaptation of *Ae. albopictus* toward temperate environments. Specifically,  
539 targeted resequencing of the candidate regions, including outliers, genes and their  
540 flanking regions across several individuals and populations should help to determine  
541 evidence of selective sweep, the precise extent and location of such events, and

542 eventually designate the causative selected mutations.

543 It is also important to note that the results presented here are only restricted to a subset  
544 of the Asian tiger mosquito populations located in temperate and tropical environments.  
545 Thus, it is probable that some of the outliers detected could be specific to this particular  
546 comparison and do not reflect the global pattern of differentiation between tropical and  
547 temperate populations. Research on the same outliers between other tropical and  
548 temperate populations from native and non-native areas would be extremely valuable to  
549 extrapolate our results at a larger scale and refute possible false positive. Should the  
550 same outlier insertions be found at high frequencies in temperate locations – such as in  
551 USA, Japan or China –, extended investigations about the origin of invasive populations  
552 would help clarify if those similarities are due to an ancestral sweep or parallel sweeps  
553 that occurred independently in several populations. This study already provides a set of  
554 functional primers for some candidate loci that could be directly used to answer this  
555 question in *Ae. albopictus* DNA samples. As with every novel method, our study may be  
556 susceptible to unforeseen or underrated bias; though we attempted to remove these  
557 issues (such as controlling the relationship between loci coverage and insertion  
558 frequency), we identified several points that must be taken into account for interpretation  
559 of the results. First, unlike random SNPs, TE insertions can be potential targets of  
560 purifying selection, which can sometimes mimic the diversity pattern of a selective  
561 sweep (Charlesworth *et al.* 1993; Stephan 2010). However, as reported earlier,  
562 insertions are found at low frequencies and negative selection for the “presence” of TE  
563 is likely to produce a slight change in the allele frequency spectrum. Another issue may

564 be the uncertainty related to the null model used in the genome scan; even if we did not  
565 explicitly evaluate the fit of our data to a specific population model, we did not find  
566 evidence to reject an island model such as that implemented in Bayescan. This software  
567 is also the best suited to handle our dominant data but is indeed restricted to mainly  
568 detect recent, strong and monogenic positive selection (Pérez-Figueroa *et al.* 2010;  
569 Narum & Hess 2011; de Villemereuil *et al.* 2014); additionally, it should be insightful to  
570 compare our results with more diverse genome-scan models and we would like to  
571 emphasize that our results were produced under the specific hypothesis of the model  
572 used.

573 Here, we report the first information supporting adaptive evolution at the molecular level  
574 in the Asian tiger mosquito. Progress in the annotation of published genomes and the  
575 looming availability of supplementary genomic resources will allow the most gain from  
576 these results. We hope that this work will contribute to unraveling the implications of  
577 adaptive processes during the invasion of disease vectors.

578

## 579 **Acknowledgements**

580 We thank Van Tran-Van, Christophe Bellet, Grégory Lambert, Huynh Kim Ly Khanh and  
581 Trang Huynh who made possible and contributed to sampling in France and Vietnam.

582 We are grateful to Valèria Romero Soriano and her family for their help during sampling  
583 in Sant Cugat dèl Vallès. Library construction and sequencing was performed in  
584 collaboration with Clémence Genthon and Olivier Bouchez. We thank Manon Vigneron

585 for PCR validation experiment work. We also thank Rita Rebollo, who provided insightful  
586 comments and English revision of the manuscript. This work was performed using the  
587 computing facilities of the CC LBBE/PRABI. C.G. received a grant from the French  
588 Ministry of Superior Education. This work was supported by the Centre National de la  
589 Recherche Scientifique and the Institut Universitaire de France and preliminary  
590 experiments benefited from a grant from the Federation de Recherche 41 “Bio-  
591 Environnement et Santé”. Funding for mosquito sampling in Vietnam was provided by  
592 grants from EC2CO CNRS and occurred within the framework of GDR1 “Biodiversity and  
593 Infectious Diseases in Southeast Asia”. Original maps used to describe sampling were  
594 downloaded from [http://d-maps.com/carte.php?num\\_car=4719&lang=en](http://d-maps.com/carte.php?num_car=4719&lang=en) and [http://d-](http://d-maps.com/carte.php?num_car=708&lang=en)  
595 [maps.com/carte.php?num\\_car=708&lang=en](http://d-maps.com/carte.php?num_car=708&lang=en).

596

## 597 **References**

- 598  
599 Akkouche A, Rebollo R, Burlet N *et al.* (2012) tirant, a newly discovered active  
600 endogenous retrovirus in *Drosophila simulans*. *Journal of virology*, **86**, 3675–81.
- 601 Becker N, Geier M, Balczun C *et al.* (2013) Repeated introduction of *Aedes albopictus*  
602 into Germany, July to October 2012. *Parasitology research*, **112**, 1787–90.
- 603 Biedler J, Qi Y, Holligan D *et al.* (2003) Transposable element (TE) display and rapid  
604 detection of TE insertion polymorphism in the *Anopheles gambiae* species complex.  
605 *Insect Molecular Biology*, **12**, 211–216.
- 606 Birungi J, Munstermann LE (2002) Genetic Structure of *Aedes albopictus* (Diptera:  
607 Culicidae) Populations Based on Mitochondrial ND5 Sequences: Evidence for an  
608 Independent Invasion into Brazil and United States. *Annals of the Entomological*  
609 *Society of America*, **95**, 125–132.
- 610 Black WC, Ferrari JA, Sprengert D (1988) Breeding structure of a colonising species :  
611 *Aedes albopictus* ( Skuse ) in the United States. , **60**.

- 612 Bonin A, Paris M, Després L *et al.* (2008) A MITE-based genotyping method to reveal  
613 hundreds of DNA polymorphisms in an animal genome after a few generations of  
614 artificial selection. *BMC genomics*, **9**, 459.
- 615 Bonin A, Paris M, Tetreau G, David J-P, Després L (2009) Candidate genes revealed by  
616 a genome scan for mosquito resistance to a bacterial insecticide: sequence and  
617 gene expression variations. *BMC genomics*, **10**, 551.
- 618 Bonizzoni M, Gasperi G, Chen X, James AA (2013) The invasive mosquito species  
619 *Aedes albopictus*: current knowledge and future perspectives. *Trends in*  
620 *parasitology*, **29**, 460–468.
- 621 Boulesteix M, Simard F, Antonio-Nkondjio C *et al.* (2007) Insertion polymorphism of  
622 transposable elements and population structure of *Anopheles gambiae* M and S  
623 molecular forms in Cameroon. *Molecular ecology*, **16**, 441–452.
- 624 Braverman JM, Hudson RR, Kaplan NL, Langley CH, Stephan W (1995) The hitchhiking  
625 effect on the site frequency spectrum of DNA polymorphisms. *Genetics*, **140**.
- 626 Bridier-Nahmias A, Tchalikian-Cosson A, Baller JA *et al.* (2015) Retrotransposons. An  
627 RNA polymerase III subunit determines sites of retrotransposon integration.  
628 *Science (New York, N. Y.)*, **348**, 585–8.
- 629 Carnelossi EAG, Lerat E, Henri H *et al.* (2014) Specific activation of an I-like element in  
630 *Drosophila* interspecific hybrids. *Genome biology and evolution*, **6**, 1806–17.
- 631 Casacuberta E, González J (2013) The impact of transposable elements in  
632 environmental adaptation. *Molecular ecology*, 1503–1517.
- 633 Charlesworth B, Morgan MT, Charlesworth D (1993) The effect of deleterious mutations  
634 on neutral molecular variation. *Genetics*, **134**, 1289–1303.
- 635 Chen X-G, Jiang X, Gu J *et al.* (2015) Genome sequence of the Asian Tiger mosquito,  
636 *Aedes albopictus*, reveals insights into its biology, genetics, and evolution.  
637 *Proceedings of the National Academy of Sciences of the United States of America*,  
638 **112**, E5907-5915.
- 639 Chouin-Carneiro T, Vega-Rua A, Vazeille M *et al.* (2016) Differential Susceptibilities of  
640 *Aedes aegypti* and *Aedes albopictus* from the Americas to Zika Virus (MJ Turell,  
641 Ed.). *PLOS Neglected Tropical Diseases*, **10**, e0004543.
- 642 Colautti RI, Lau JA (2015) Contemporary evolution during invasion: evidence for  
643 differentiation, natural selection, and local adaptation. *Molecular Ecology*, **24**, 1999–  
644 2017.
- 645 Davey JW, Cezard T, Fuentes-Utrilla P *et al.* (2012) Special features of RAD  
646 Sequencing data: implications for genotyping. *Molecular ecology*.
- 647 Denlinger DL, Armbruster PA (2016) Molecular Physiology of Mosquito Diapause. In:



- 648        *Advances in Insect Physiology*, pp. 329–361.
- 649        Dray S, Dufour A-B (2007) The ade4 Package: Implementing the Duality Diagram for  
650        Ecologists. *Journal of Statistical Software*, **22**, 1–20.
- 651        Dritsou V, Topalis P, Windbichler N *et al.* (2015) A draft genome sequence of an  
652        invasive mosquito: an Italian *Aedes albopictus*. *Pathogens and global health*,  
653        2047773215Y0000000031.
- 654        Esnault C, Boulesteix M, Duchemin JB *et al.* (2008) High genetic differentiation between  
655        the M and S molecular forms of *Anopheles gambiae* in Africa. (P Awadalla, Ed.),  
656        *PloS one*, **3**, e1968.
- 657        Excoffier L, Lischer HEL (2010) Arlequin suite ver 3.5: a new series of programs to  
658        perform population genetics analyses under Linux and Windows. *Molecular ecology*  
659        *resources*, **10**, 564–7.
- 660        Fay JC, Wu CI (2000) Hitchhiking under positive Darwinian selection. *Genetics*, **155**,  
661        1405–13.
- 662        Foll M, Gaggiotti O (2008) A genome-scan method to identify selected loci appropriate  
663        for both dominant and codominant markers: a Bayesian perspective. *Genetics*, **180**,  
664        977–93.
- 665        Goubert C, Minard G, Vieira C, Boulesteix M (2016) Population genetics of the Asian  
666        tiger mosquito *Aedes albopictus*, an invasive vector of human diseases. *Heredity*.
- 667        Goubert C, Modolo L, Vieira C *et al.* (2015) De novo assembly and annotation of the  
668        Asian tiger mosquito (*Aedes albopictus*) repeatome with dnaPipeTE from raw  
669        genomic reads and comparative analysis with the yellow fever mosquito (*Aedes*  
670        *aegypti*). *Genome Biology and Evolution*, evv050-.
- 671        Gower JC, Legendre P (1986) Metric and Euclidean properties of dissimilarity  
672        coefficients. *Journal of Classification*, **3**, 5–48.
- 673        Grard G, Caron M, Mombo IM *et al.* (2014) Zika Virus in Gabon (Central Africa) – 2007:  
674        A New Threat from *Aedes albopictus*? (R Charrel, Ed.). *PLoS Neglected Tropical*  
675        *Diseases*, **8**, e2681.
- 676        Gupta S, Preet S (2014) Genetic differentiation of invasive *Aedes albopictus* by RAPD-  
677        PCR: Implications for effective vector control. *Parasitology Research*, **113**, 2137–  
678        2142.
- 679        Hanson SM, Craig GB (1994) Cold Acclimation, Diapause, and Geographic Origin Affect  
680        Cold Hardiness in Eggs of *Aedes albopictus* (Diptera: Culicidae). *Journal of Medical*  
681        *Entomology*, **31**, 192–201.
- 682        Hawley WA (1988) The biology of *Aedes albopictus*. *Journal of the American Mosquito*  
683        *Control Association. Supplement*, **1**, 1–39.



- 684 Hawley W, Reiter P, Copeland R, Pumpuni C, Craig G (1987) *Aedes albopictus* in North  
685 America: probable introduction in used tires from northern Asia. *Science*, **236**,  
686 1114–1116.
- 687 Huang X, Poelchau MF, Armbruster PA (2015) Global Transcriptional Dynamics of  
688 Diapause Induction in Non-Blood-Fed and Blood-Fed *Aedes albopictus* (KE Olson,  
689 Ed.). *PLOS Neglected Tropical Diseases*, **9**, e0003724.
- 690 Iskow RC, McCabe MT, Mills RE *et al.* (2010) Natural mutagenesis of human genomes  
691 by endogenous retrotransposons. *Cell*, **141**, 1253–1261.
- 692 Kambhampati S, Black WC, Rai KS (1991) Geographic origin of the US and Brazilian  
693 *Aedes albopictus* inferred from allozyme analysis. *Heredity*, **67 ( Pt 1)**, 85–93.
- 694 Kent WJ (2002) BLAT---The BLAST-Like Alignment Tool. *Genome research*, **12**, 656–  
695 64.
- 696 Lande R (2015) Evolution of phenotypic plasticity in colonizing species. *Molecular  
697 ecology*.
- 698 Lewontin RC, Krakauer J (1973) Distribution of gene frequency as a test of the theory of  
699 the selective neutrality of polymorphisms. *Genetics*, **74**, 175–195.
- 700 Li W, Godzik A (2006) Cd-hit: a fast program for clustering and comparing large sets of  
701 protein or nucleotide sequences. *Bioinformatics (Oxford, England)*, **22**, 1658–9.
- 702 Manni M, Gomulski LM, Aketarawong N *et al.* (2015) Molecular markers for analyses of  
703 intraspecific genetic diversity in the Asian Tiger mosquito, *Aedes albopictus*.  
704 *Parasites & vectors*, **8**, 188.
- 705 Marcondes CB, Ximenes M de FF de M (2015) Zika virus in Brazil and the danger of  
706 infestation by *Aedes* (*Stegomyia*) mosquitoes. *Revista da Sociedade Brasileira de  
707 Medicina Tropical*.
- 708 Martin M (2011) Cutadapt removes adapter sequences from high-throughput  
709 sequencing reads. *EMBnet.journal*, **17**, 10.
- 710 Maynard Smith J, Haigh J (1974) The hitch-hiking effect of a favourable gene. *Genetical  
711 Research*, **23**, 23.
- 712 Messer PW, Petrov DA (2013) Population genomics of rapid adaptation by soft selective  
713 sweeps. *Trends in Ecology & Evolution*, **28**, 659–669.
- 714 Miller MR, Dunham JP, Amores A, Cresko WA, Johnson EA (2007) Rapid and cost-  
715 effective polymorphism identification and genotyping using restriction site  
716 associated DNA (RAD) markers. *Genome research*, **17**, 240–8.
- 717 Minard G, Tran F-H, Tran-van V *et al.* (2015) French invasive Asian tiger mosquito  
718 populations harbor reduced bacterial microbiota and genetic diversity compared to

- 719 Vietnamese autochthonous relatives. *Frontiers in Microbiology*, **6**.
- 720 Modolo L, Lerat E (2015) UrQt: an efficient software for the Unsupervised Quality  
721 trimming of NGS data. *BMC Bioinformatics*, **16**, 137.
- 722 Monden Y, Tahara M (2015) Plant Transposable Elements and Their Application to  
723 Genetic Analysis via High-throughput Sequencing Platform. *The Horticulture*  
724 *Journal*.
- 725 Monden Y, Yamaguchi K, Tahara M (2014) Application of iPBS in high-throughput  
726 sequencing for the development of retrotransposon-based molecular markers.  
727 *Current Plant Biology*.
- 728 Mori A, Oda T, Wada Y (1981) Studies on the egg diapause and overwintering of *Aedes*  
729 *albopictus* in Nagasaki. *Tropical Medicine*, **23**, 79–90.
- 730 Munroe DJ, Haas M, Bric E *et al.* (1994) IRE-bubble PCR: a rapid method for efficient  
731 and representative amplification of human genomic DNA sequences from complex  
732 sources. *Genomics*, **19**, 506–14.
- 733 Narum SR, Hess JE (2011) Comparison of FST outlier tests for SNP loci under  
734 selection. *Molecular Ecology Resources*, **11**, 184–194.
- 735 Nielsen R (2005) Molecular signatures of natural selection. *Annual review of genetics*,  
736 **39**, 197–218.
- 737 Paupy C, Delatte H, Bagny L, Corbel V, Fontenille D (2009) *Aedes albopictus*, an  
738 arbovirus vector: from the darkness to the light. *Microbes and infection / Institut*  
739 *Pasteur*, **11**, 1177–85.
- 740 Peischl S, Excoffier L (2015) Expansion load: recessive mutations and the role of  
741 standing genetic variation. *Molecular ecology*.
- 742 Pérez-Figueroa A, García-Pereira MJ, Saura M, Rolán-Alvarez E, Caballero A (2010)  
743 Comparing three different methods to detect selective loci using dominant markers.  
744 *Journal of evolutionary biology*, **23**, 2267–76.
- 745 Poelchau MF, Reynolds J a, Elsik CG, Denlinger DL, Armbruster P a (2013a) Deep  
746 sequencing reveals complex mechanisms of diapause preparation in the invasive  
747 mosquito, *Aedes albopictus*. *Proceedings. Biological sciences / The Royal Society*,  
748 **280**, 20130143.
- 749 Poelchau MF, Reynolds J a, Elsik CG, Denlinger DL, Armbruster P a (2013b) RNA-Seq  
750 reveals early distinctions and late convergence of gene expression between  
751 diapause and quiescence in the Asian tiger mosquito, *Aedes albopictus*. *The*  
752 *Journal of experimental biology*, **216**, 4082–4090.
- 753 Porretta D, Mastrantonio V, Bellini R, Somboon P, Urbanelli S (2012) Glacial history of a  
754 modern invader: phylogeography and species distribution modelling of the Asian

- 755 tiger mosquito *Aedes albopictus*. *PLoS one*, **7**, e44515.
- 756 Pritchard JK, Pickrell JK, Coop G (2010) The Genetics of Human Adaptation: Hard  
757 Sweeps, Soft Sweeps, and Polygenic Adaptation. *Current Biology*, **20**, R208–R215.
- 758 Quinlan AR, Hall IM (2010) BEDTools: a flexible suite of utilities for comparing genomic  
759 features. *Bioinformatics (Oxford, England)*, **26**, 841–2.
- 760 Recknagel H, Jacobs A, Herzyk P, Elmer KR (2015) Double-digest RAD sequencing  
761 using Ion Proton semiconductor platform (ddRADseq-ion) with nonmodel  
762 organisms. *Molecular Ecology Resources*, **15**, 1316–1329.
- 763 Rishishwar L, Tellez Villa CE, Jordan IK *et al.* (2015) Transposable element  
764 polymorphisms recapitulate human evolution. *Mobile DNA*, **6**, 21.
- 765 Roy AM, Carroll ML, Kass DH *et al.* (1999) Recently integrated human Alu repeats:  
766 finding needles in the haystack. *Genetica*, **107**, 149–161.
- 767 Sabot F, Picault N, El-Baidouri M *et al.* (2011) Transpositional landscape of the rice  
768 genome revealed by paired-end mapping of high-throughput re-sequencing data.  
769 *The Plant Journal*, **66**, 241–246.
- 770 Santolamazza F, Mancini E, Simard F *et al.* (2008) Insertion polymorphisms of SINE200  
771 retrotransposons within speciation islands of *Anopheles gambiae* molecular forms.  
772 *Malaria journal*, **7**, 163.
- 773 Schrader L, Kim JW, Ence D *et al.* (2014) Transposable element islands facilitate  
774 adaptation to novel environments in an invasive species. *Nature communications*,  
775 **5**, 5495.
- 776 Stapley J, Santure AW, Dennis SR (2015) Transposable elements as agents of rapid  
777 adaptation may explain the genetic paradox of invasive species. *Molecular ecology*,  
778 **24**, 2241–52.
- 779 Stephan W (2010) Genetic hitchhiking versus background selection: the controversy and  
780 its implications. *Philosophical transactions of the Royal Society of London. Series B,*  
781 *Biological sciences*, **365**, 1245–53.
- 782 Tajima F (1989) Statistical method for testing the neutral mutation hypothesis by DNA  
783 polymorphism. *Genetics*, **123**.
- 784 Takumi K, Scholte E-J, Braks M *et al.* (2009) Introduction, scenarios for establishment  
785 and seasonal activity of *Aedes albopictus* in The Netherlands. *Vector borne and*  
786 *zoonotic diseases (Larchmont, N.Y.)*, **9**, 191–6.
- 787 Urbanelli S, Bellini R, Carrieri M, Sallicandro P, Celli G (2000) Population structure of  
788 *Aedes albopictus* (Skuse): the mosquito which is colonizing Mediterranean  
789 countries. *Heredity*, **84 ( Pt 3)**, 331–337.

- 790 Urbanski JM, Benoit JB, Michaud MR, Denlinger DL, Armbruster P (2010) The molecular  
791 physiology of increased egg desiccation resistance during diapause in the invasive  
792 mosquito, *Aedes albopictus*. *Proceedings. Biological sciences / The Royal Society*,  
793 **277**, 2683–92.
- 794 Urbanski J, Mogi M, O'Donnell D *et al.* (2012) Rapid adaptive evolution of photoperiodic  
795 response during invasion and range expansion across a climatic gradient. *The*  
796 *American naturalist*, **179**, 490–500.
- 797 de Villemereuil P, Frichot E, Bazin E, François O, Gaggiotti OE (2014) Genome scan  
798 methods against more complex models: when and how much should we trust  
799 them? *Molecular ecology*, **23**, 2006–2019.
- 800 Vitti JJ, Grossman SR, Sabeti PC (2013) Detecting Natural Selection in Genomic Data.  
801 *Annual Review of Genetics*, **47**, 97–120.
- 802 Watkins WS, Rogers AR, Ostler CT *et al.* (2003) Genetic variation among world  
803 populations: inferences from 100 Alu insertion polymorphisms. *Genome research*,  
804 **13**, 1607–18.
- 805 Witherspoon DJ, Xing J, Zhang Y *et al.* (2010) Mobile element scanning (ME-Scan) by  
806 targeted high-throughput sequencing. *BMC genomics*, **11**, 410.
- 807 Witherspoon DJ, Zhang Y, Xing J *et al.* (2013) Mobile element scanning (ME-Scan)  
808 identifies thousands of novel Alu insertions in diverse human populations. *Genome*  
809 *Research*, **23**, 1170–1181.
- 810 Zhong D, Lo E, Hu R *et al.* (2013) Genetic analysis of invasive *Aedes albopictus*  
811 populations in Los Angeles County, California and its potential public health impact.  
812 *PLoS one*, **8**, e68586.

813

## 814 **Data Accessibility**

815 Paired-end raw sequences are available through SRA at NCBI under SRP070185

816 (Bioproject PRJNA312147)

817 Final presence/absence matrices (including replicates) are available at Dryad

818 (doi:10.5061/dryad.9p925) at <http://datadryad.org/review?doi=doi:10.5061/dryad.9p925>

## 819 **Author contributions**

820 CG, CV and MB conceived of the experiments and conducted the analyses. CG and HH  
821 developed and performed the molecular experiments. GM, CVM and PM conducted the  
822 sampling in France and Vietnam. All authors contributed to the final version of the  
823 manuscript.

824 **Tables and Figures**

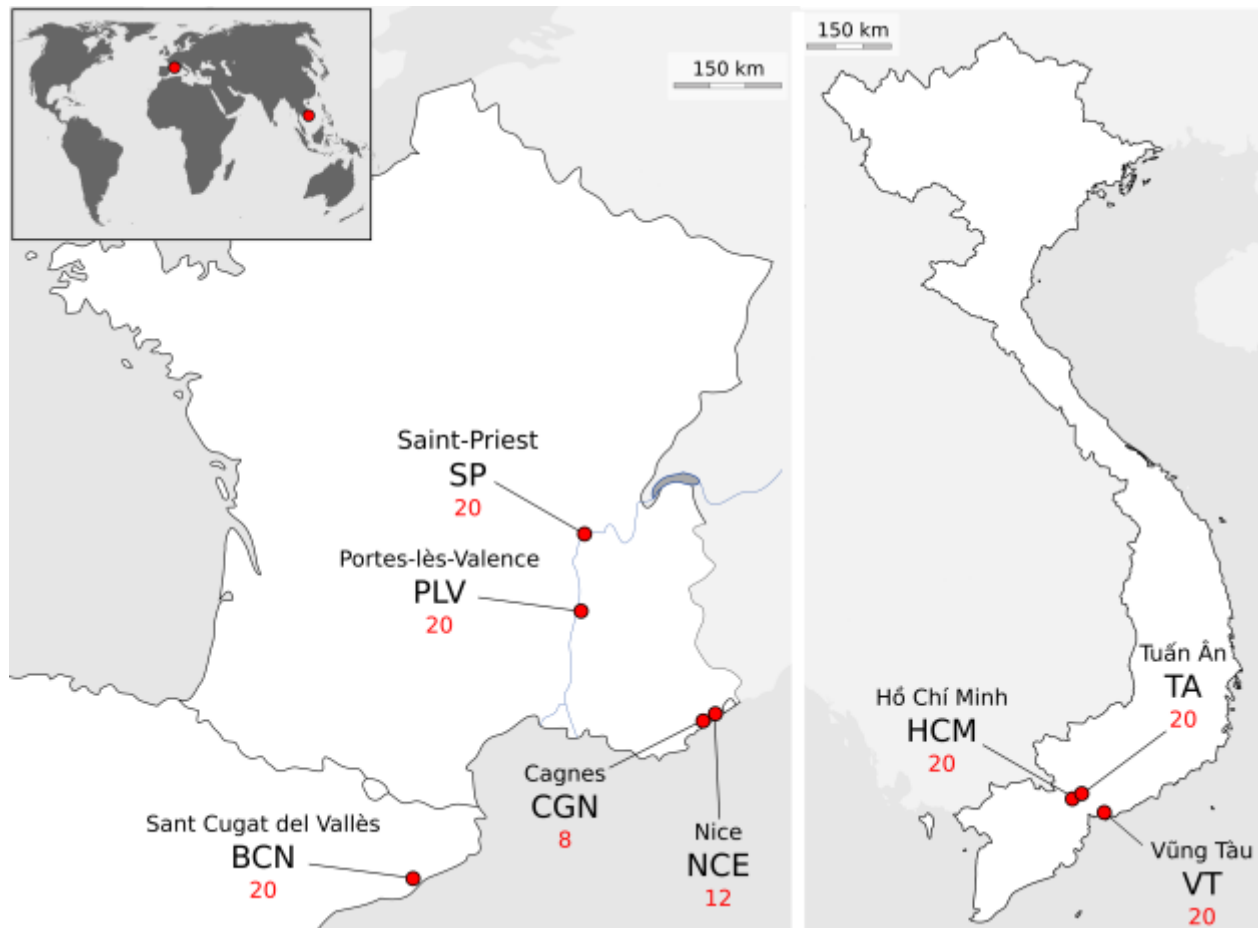

826 **Figure 1.** Sampling sites (with abbreviations) of *Ae. albopictus* in Europe and Vietnam.  
827 Red numbers correspond to the total number of individuals sampled. Supporting  
828 information on samples is available in Table S1.

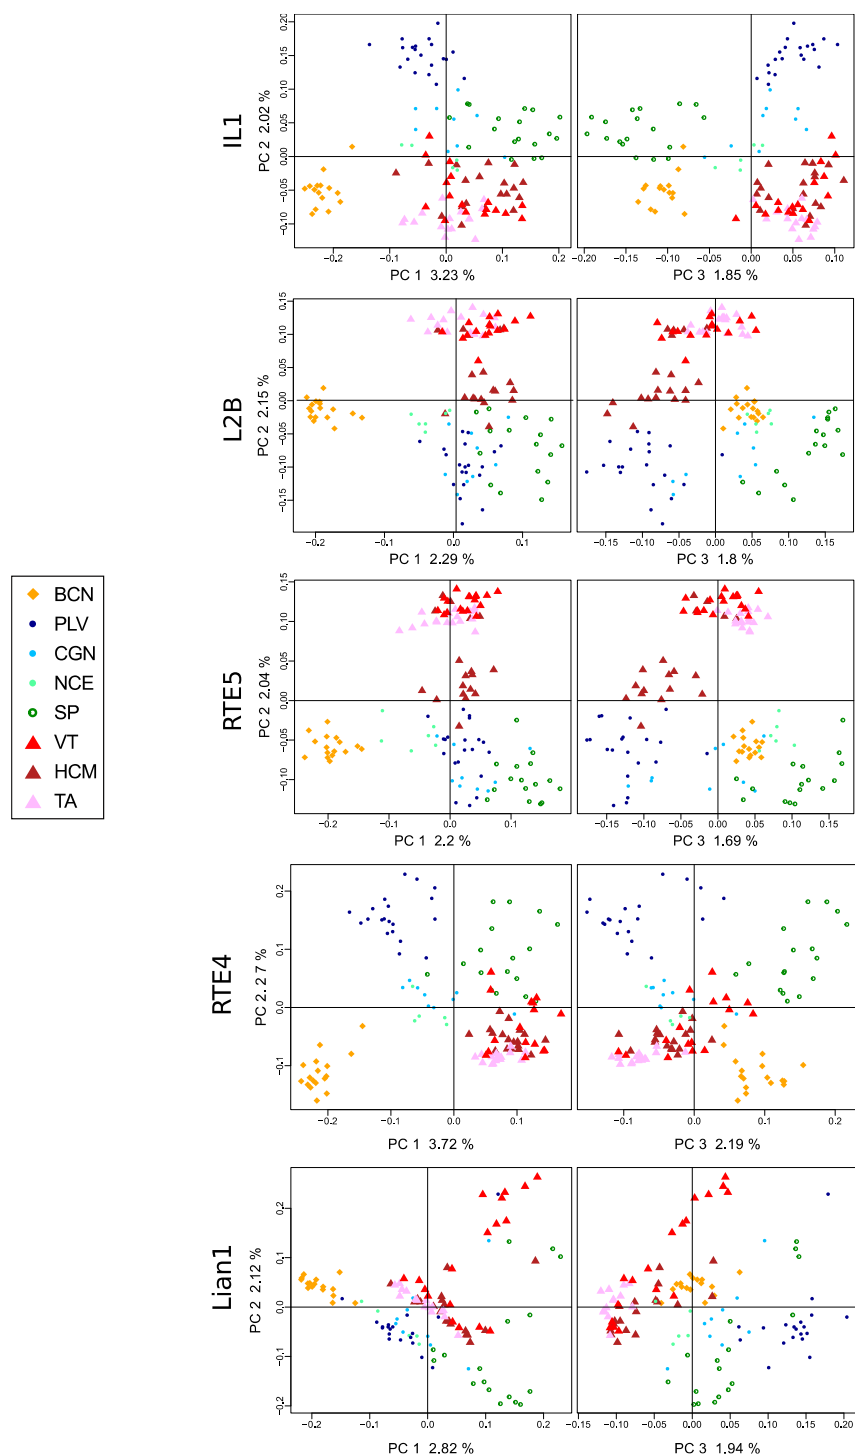

829

830 **Figure 2. Principal coordinates analyses (PCoAs).** Projection of individuals over the  
831 three first principal coordinates (PC) of PCoAs for each of the 5 TE families and for the  
832 first replicate (M1, see Materials and Methods). The proportion of inertia represented by  
833 each axes is noted in %. Circles: European populations; triangles: Vietnamese  
834 populations. The results for other sampling replicates can be found in Figure S4.

835 **Table 1. Analyses of molecular variance (AMOVAs). The results** for the three  
836 replicates (M1, M2, M3) of read sampling for the five TE families (IL1, L2B, RTE5, RTE4,  
837 Lian1). Values are given in percentage of the total genetic variance.

|                                 | IL1           | L2B           | RTE5          | RTE4          | Lian1         |
|---------------------------------|---------------|---------------|---------------|---------------|---------------|
| Among groups                    | [0.59-0.70]   | [1.22-1.29]   | [1.08-1.10]   | [1.97-2.04]   | [0.67-0.74]   |
| Among populations within groups | [5.15-5.37]   | [3.58-3.63]   | [3.36-3.40]   | [6.67-6.78]   | [4.47-4.56]   |
| Within populations              | [94.04-94.16] | [95.08-95.18] | [95.51-95.55] | [91.18-91.30] | [94.77-94.81] |

Intervals report min and max values among the 3 sampling replicates

838



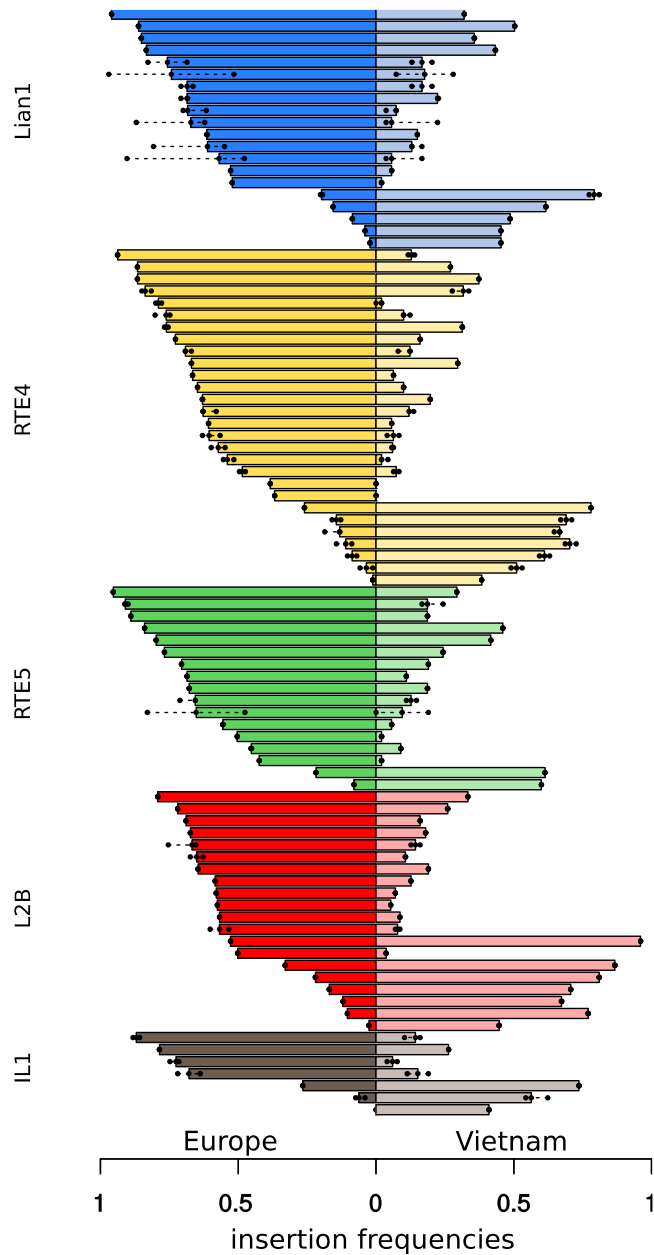

839

840 **Figure 3. Insertion frequencies in Europe and Vietnam for 92 outlier loci.** Bars  
841 represent the median value from the three reads sampling replicates and dots represent  
842 the values from the other replicates (if outlier(s) found in replicates). Colors correspond  
843 to each of the 5 TE families.

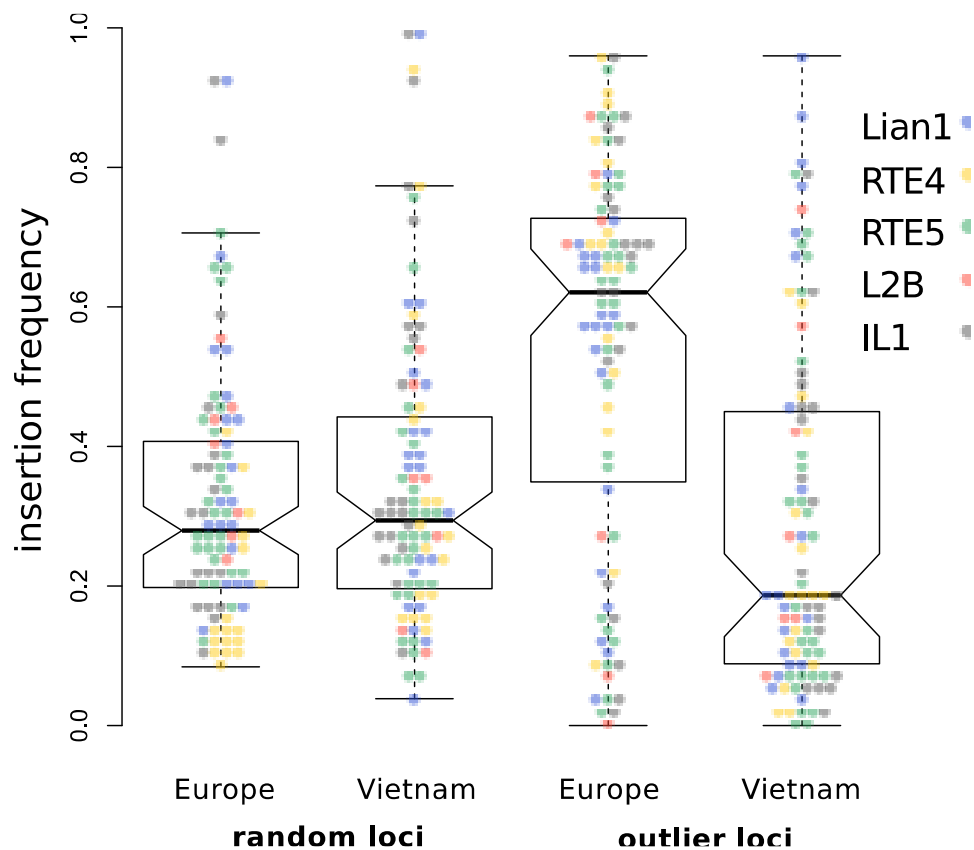

844

845 **Figure 4. Comparison of outlier frequencies with randomly selected loci.** Insertion  
846 frequencies of 92 randomly chosen loci among those with the same minimum insertion  
847 frequency ( $\geq 20$  individuals) as outliers compared with 92 outlier loci. The random loci  
848 were taken from the first replicate (M1) and values for outliers are median values  
849 obtained from the three replicates. Non-overlapping notches indicate a significant  
850 difference between the true medians (dark horizontal bars).
